# Supplementary material for: An Evaluation of the Dough Rheology and Bread Quality of Replacement Wheat Flour with Different Quinoa Particle Sizes
Source: MDPI journal article supplement (doi:10.3390/agronomy12102271), 2022-09-22
Supplement: s1 [file s1]

**Table S1.** Actual and coded values of formulation factors in the experimental design.

| Run | A            | B     | Particle Size (µm) | Quinoa Flour (%) |
|-----|--------------|-------|--------------------|------------------|
|     | Coded Values |       | Real Values        |                  |
| 1   | +1.00        | +1.00 | 380                | 20               |
| 2   | +1.00        | +0.50 | 380                | 15               |
| 3   | +1.00        | 0.00  | 380                | 10               |
| 4   | +1.00        | −0.50 | 380                | 5                |
| 5   | +1.00        | −1.00 | 380                | 0                |
| 6   | 0.00         | +1.00 | 280                | 20               |
| 7   | 0.00         | +0.05 | 280                | 15               |
| 8   | 0.00         | 0.00  | 280                | 10               |
| 9   | 0.00         | −0.50 | 280                | 5                |
| 10  | 0.00         | −1.00 | 280                | 0                |
| 11  | −1.00        | +1.00 | 180                | 20               |
| 12  | −1.00        | +0.50 | 180                | 15               |
| 13  | −1.00        | 0.00  | 180                | 10               |
| 14  | −1.00        | −0.50 | 180                | 5                |
| 15  | −1.00        | −1.00 | 180                | 0                |
